# Supplementary material for: Registered Drug Packs of Antimicrobials and Treatment Guidelines for Prostatitis: Are They in Accordance?
Source: MDPI journal article supplement (doi:10.3390/healthcare10071158), 2022-06-22

**Table S1.** Comparison of prostatitis treatment guidelines

| ISKRA [1]                   |                                                                                                                                                                                                                                                                                       | NICE [2]                                                                                                                                                                                 |                                                                                                                                                                                                                                                                                                                                                                                                                                                                               | AFP [3]                                         |                                                                                                                                                   | ATGAR [4]                                         |                                                                                                                                                                                  | SSID [5]                                                                                                                                                                                                                                                                   |                                  | IIUS [6]                                                                                                      |                |
|-----------------------------|---------------------------------------------------------------------------------------------------------------------------------------------------------------------------------------------------------------------------------------------------------------------------------------|------------------------------------------------------------------------------------------------------------------------------------------------------------------------------------------|-------------------------------------------------------------------------------------------------------------------------------------------------------------------------------------------------------------------------------------------------------------------------------------------------------------------------------------------------------------------------------------------------------------------------------------------------------------------------------|-------------------------------------------------|---------------------------------------------------------------------------------------------------------------------------------------------------|---------------------------------------------------|----------------------------------------------------------------------------------------------------------------------------------------------------------------------------------|----------------------------------------------------------------------------------------------------------------------------------------------------------------------------------------------------------------------------------------------------------------------------|----------------------------------|---------------------------------------------------------------------------------------------------------------|----------------|
| Acute bacterial prostatitis |                                                                                                                                                                                                                                                                                       |                                                                                                                                                                                          |                                                                                                                                                                                                                                                                                                                                                                                                                                                                               |                                                 |                                                                                                                                                   |                                                   |                                                                                                                                                                                  |                                                                                                                                                                                                                                                                            |                                  |                                                                                                               |                |
| First choice                | 3rd generation cephalosporins ± aminoglycosides or Aminopenicillins + beta-lactamase inhibitors or Ureidopenicillins + beta-lactamase inhibitors or Fluoroquinolones (ciprofloxacin, levofloxacin), Parenteral 7 – 10 days, followed by oral fluoroquinolones for further 2 – 4 weeks | First-choice oral antibiotics (guided by susceptibilities when available)                                                                                                                | Ciprofloxacin oral 2 x 500 mg, 2 weeks<br>Ofloxacin 2 x 200 mg, 2 weeks                                                                                                                                                                                                                                                                                                                                                                                                       | Mild or moderate disease while awaiting culture | Trimethoprim oral 1 x 300 mg 2 weeks, or Cephalexin oral 2 x 500 mg, 2 weeks or Amoxicillin and clavulanic acid 2 x 500 mg + 125 mg oral, 2 weeks | First choice                                      | Ciprofloxacin oral 2 x 500 mg, 4 weeks<br>Levofloxacin oral 1 x 500 mg, 4 weeks<br>Cefixime oral 1 x 400 mg, 4 weeks<br>These antibiotics can be combined with an aminoglycoside | Ciprofloxacin 400 mg/12 h i. v. or oral 2 x 500 mg, 2 – 4 weeks<br>Levofloxacin 500 mg/24 h i. v. a or oral 1 x 500 mg, 2 – 4 weeks<br>Trimethoprim-sulfamethoxazole oral 2 x 160/800 mg, 2 – 4 weeks<br>Gentamicin 5 mg/kg a day with or without ampicillin 2 g/6 h i. v. | Empirical treatment              | Levofloxacin oral 1-2 x 500 mg, 2 – 4 weeks<br>Trimethoprim-sulfamethoxazole oral 2 x 160/800 mg, 2 – 4 weeks |                |
|                             |                                                                                                                                                                                                                                                                                       | Alternative first-choice oral antibiotic if a fluoroquinolone antibiotic is not appropriate (seek specialist advice; guided by susceptibilities when available)                          | Trimethoprim oral 2 x 200 mg, 2 weeks                                                                                                                                                                                                                                                                                                                                                                                                                                         |                                                 |                                                                                                                                                   | Alternative                                       | Trimethoprim-sulfamethoxazole oral 2 x 160/800 mg, 4 weeks                                                                                                                       |                                                                                                                                                                                                                                                                            | if allergic to a fluoroquinolone | Amoxicillin and clavulanic acid oral 3 x 1 g, 2 – 4 weeks                                                     |                |
|                             |                                                                                                                                                                                                                                                                                       | First-choice intravenous antibiotics (if unable to take oral antibiotics or severely unwell; guided by susceptibilities when available). Antibiotics may be combined if sepsis a concern | Ciprofloxacin 400 mg twice or three times a day<br>Levofloxacin 500 mg once a day<br>Cefuroxime: 1.5 g three or four times a day<br>Ceftriaxone: 2 g once a day<br>Gentamicin: Initially 5 mg/kg to 7 mg/kg once a day, subsequent doses adjusted according to serum gentamicin concentration.<br>Amikacin: Initially 15 mg/kg once a day (maximum per dose 1.5 g once a day), subsequent doses adjusted according to serum amikacin concentration (maximum 15 g per course). |                                                 |                                                                                                                                                   | Appears septic or unable to tolerate oral therapy | Admit to hospital, offer parenteral therapy with ampicillin and gentamycin or ceftriaxone as per severe pyelonephritis treatment                                                 |                                                                                                                                                                                                                                                                            | Appears septic                   | Hospital referral for initial intravenous treatment                                                           | Appears septic |
| Second choice               | Carbapenems, Parenteral 7 – 10                                                                                                                                                                                                                                                        | Second-choice oral antibiotics                                                                                                                                                           | Levofloxacin oral 1 x 500 mg, 2 weeks then review                                                                                                                                                                                                                                                                                                                                                                                                                             |                                                 |                                                                                                                                                   |                                                   |                                                                                                                                                                                  |                                                                                                                                                                                                                                                                            |                                  |                                                                                                               |                |

|                               |                                                                                                                                                                                                                                                                                                        |                                       |                                                                                                                                                                                                                                                         |                                  |                                                                                |              |                                                                                         |                                                                                                                                                         |                                  |                                                                                           |
|-------------------------------|--------------------------------------------------------------------------------------------------------------------------------------------------------------------------------------------------------------------------------------------------------------------------------------------------------|---------------------------------------|---------------------------------------------------------------------------------------------------------------------------------------------------------------------------------------------------------------------------------------------------------|----------------------------------|--------------------------------------------------------------------------------|--------------|-----------------------------------------------------------------------------------------|---------------------------------------------------------------------------------------------------------------------------------------------------------|----------------------------------|-------------------------------------------------------------------------------------------|
|                               | days, followed by oral fluoroquinolones for further 2 – 4 weeks<br>or<br>Trimethoprim-sulfamethoxazole, Parenteral/Oral 2 – 3 weeks                                                                                                                                                                    | (after discussion with specialist)    | Trimethoprim-sulfamethoxazole oral 2 x 160/800 mg, 2 weeks then review Trimethoprim-sulfamethoxazole should only be considered when there is bacteriological evidence of sensitivity and good reasons to prefer this combination to a single antibiotic |                                  |                                                                                |              |                                                                                         |                                                                                                                                                         |                                  |                                                                                           |
|                               |                                                                                                                                                                                                                                                                                                        | Second-choice intravenous antibiotics | Consult a local microbiologist                                                                                                                                                                                                                          |                                  |                                                                                |              |                                                                                         |                                                                                                                                                         |                                  |                                                                                           |
| Chronic bacterial prostatitis |                                                                                                                                                                                                                                                                                                        |                                       |                                                                                                                                                                                                                                                         |                                  |                                                                                |              |                                                                                         |                                                                                                                                                         |                                  |                                                                                           |
| First choice                  | Fluoroquinolones (ciprofloxacin, levofloxacin, ofloxacin)<br>or<br>Trimethoprim-sulfamethoxazole, Oral, 4 – 6 weeks                                                                                                                                                                                    |                                       |                                                                                                                                                                                                                                                         | First choice                     | Norfloxacin oral 2 x 400 mg, 4 weeks, or<br>Trimethoprim oral 1 x 300, 4 weeks | First choice | Ciprofloxacin oral 2 x 500 mg, 4-6 Weeks<br>or<br>Levofloxacin oral 1 x 500 mg, 4 weeks | Ciprofloxacin oral 2 x 500 mg, 6 – 12 weeks<br>Levofloxacin oral 1 x 500 mg, 6 – 12 weeks<br>Trimethoprim-sulfamethoxazole oral 2 x 960 mg, 4 – 6 weeks |                                  | Levofloxacin oral 1-2 x 500 mg, 4 – 6 weeks<br>Ciprofloxacin oral 2 x 750 mg, 4 – 6 weeks |
| Alternative                   | Macrolides, Oral, 4 – 6 weeks.<br>Possible and useful administration in combination with fluoroquinolones<br>azithromycin 500 mg daily, only for the first three days of each treatment week<br>or<br>3rd generation oral cephalosporins ± parenteral aminoglycosides, 7 – 10 days then switch to oral |                                       |                                                                                                                                                                                                                                                         | If chlamydia or ureaplasma noted | Doxycycline oral 2 x 100 mg 2-4 weeks                                          | Alternative  | Trimethoprim sulfamethoxazole Oral 2 x 160/800 mg, 4 weeks                              |                                                                                                                                                         | If chlamydia or micoplasma noted | Azithromycin oral 1 x 500 mg<br>Doxycycline oral 2 x 100 mg 2 weeks                       |

|  |                                                                             |  |  |  |  |  |  |  |  |  |
|--|-----------------------------------------------------------------------------|--|--|--|--|--|--|--|--|--|
|  | fluoroquinolones<br>or trimethoprim-<br>sulfamethoxazole<br>for 2 – 4 weeks |  |  |  |  |  |  |  |  |  |
|--|-----------------------------------------------------------------------------|--|--|--|--|--|--|--|--|--|

The numbers in the brackets represent literature.

**Table S2.** AGREE analysis of the included guidelines (available from: <https://www.agreetrust.org/resource-centre/agree-reporting-checklist/>)

|                                   | ISKRA [1] | NICE [2] | AFP [3] | ATGAR [4] | SSID [5] | IUS [6] |
|-----------------------------------|-----------|----------|---------|-----------|----------|---------|
| DOMAIN 1: SCOPE AND PURPOSE       | 79.6%     | 90.7%    | 42.5%   | 83.3%     | 40.7%    | 53.7%   |
| DOMAIN 2: STAKEHOLDER INVOLVEMENT | 72.2%     | 83.3%    | 38.8%   | 79.6%     | 42.5%    | 51.8%   |
| DOMAIN 3: RIGOUR OF DEVELOPMENT   | 70.8%     | 86.8%    | 19.4%   | 71.5%     | 17.3%    | 63.5%   |
| DOMAIN 4: CLARITY OF PRESENTATION | 81.0%     | 92.5%    | 74.1%   | 64.8%     | 55.5%    | 53.7%   |
| DOMAIN 5: APPLICABILITY           | 34.7%     | 65.2%    | 19.4%   | 36.1%     | 22.2%    | 27.7%   |
| DOMAIN 6: EDITORIAL INDEPENDENCE  | 44.4%     | 30.5%    | 5.5%    | 38.8%     | 2.7%     | 2.7%    |

The numbers in the brackets represent literature.

**Table S3.** Accordance of oral antibiotics in the ISKRA<sup>1</sup> treatment guidelines for prostatitis with drug packs available in selected countries [1].

| ISKRA <sup>1</sup><br>recommendation [1]                                              | Summary of recommendation                                        | Croatia [7]                                                                                                                                     | United Kingdom [8]                                                                        | Australia [9]                                                     | Slovenia [10]                                                                                       | Italy [11]                                                                        | Spain [12]                                                                    |
|---------------------------------------------------------------------------------------|------------------------------------------------------------------|-------------------------------------------------------------------------------------------------------------------------------------------------|-------------------------------------------------------------------------------------------|-------------------------------------------------------------------|-----------------------------------------------------------------------------------------------------|-----------------------------------------------------------------------------------|-------------------------------------------------------------------------------|
| Treatment of acute bacterial prostatitis                                              |                                                                  |                                                                                                                                                 |                                                                                           |                                                                   |                                                                                                     |                                                                                   |                                                                               |
| Oral<br>Fluoroquinolones, 2 – 4 weeks<br>after parenteral treatment                   | Ciprofloxacin 2 x 500 – 750 mg<br>2 – 4 weeks                    | 3 – 6 packs of 10 500 mg<br>± 3 – 6 packs of 10 250<br>mg, excess <b>2 or 4 units</b><br>(1 or 2 days); single<br>dose 750 mg not<br>registered | 1 – 2 packs of 28 500 mg<br>units or 2 – 4 packs of<br>14 750 mg units,<br><b>matched</b> | 1 – 2 packs of 28 500<br>or 750 mg units,<br><b>matched</b>       | 3 – 6 packs of 10 units<br>500 or 750 mg, excess<br><b>2 or 4 units</b> (1 or 2<br>days)            | 1 – 2 packs of 28<br>units 500 or 750<br>mg, <b>matched</b>                       | 2 – 4 packs of 14<br>units of 500 or 750<br>mg, <b>matched</b>                |
|                                                                                       | Levofloxacin 1 x 500 mg 2 – 4<br>weeks                           | 1 – 2 packs of 14 units,<br><b>matched</b>                                                                                                      | 2 – 4 packs of 7 units,<br><b>matched</b>                                                 | Only bulk, not<br>applicable                                      | 2 – 3 packs of 10 units,<br>excess <b>6 or 2 units</b> (6<br>or 2 days)                             | 1 pack of 14 or 28<br>units, <b>matched</b>                                       | 1 – 2 packs of 14<br>units, <b>matched</b>                                    |
|                                                                                       | Norfloxacin 2 x 400 mg 2 – 4<br>weeks                            | 2 – 3 packs of 20 units,<br>excess <b>12 or 4 units</b> (6<br>or 2 days)                                                                        | Not registered                                                                            | 1 – 2 packs of 14<br>units, <b>matched</b>                        | 2 – 3 packs of 20 units,<br>excess <b>12 or 4 units</b> (6<br>or 2 days)                            | 2 – 4 packs of 14<br>units, <b>matched</b>                                        | 2 – 4 packs of 14<br>units, <b>matched</b>                                    |
| Trimethoprim /<br>sulfamethoxazole, oral 2 – 3<br>weeks                               | Trimethoprim /<br>sulfamethoxazole 2 x 160/800<br>mg 2 – 3 weeks | 2 – 3 packs of 20 units,<br>excess <b>12 or 18 units</b> (6<br>or 9 days)                                                                       | 2 – 3 packs of 14 units,<br><b>matched</b>                                                | 3 – 5 packs of 10,<br>excess <b>2 or 8 units</b> (1<br>or 4 days) | 3 – 5 packs of 20<br>80/400 mg units,<br>excess <b>4 or 16 half<br/>dose units</b> (1 or 4<br>days) | 2 – 3 packs of 16<br>units, excess <b>4 or 6<br/>units</b> (2 or 3 days)          | 2 – 3 packs of 20<br>units, excess <b>12 or<br/>18 units</b> (6 or 9<br>days) |
| Treatment of chronic bacterial prostatitis                                            |                                                                  |                                                                                                                                                 |                                                                                           |                                                                   |                                                                                                     |                                                                                   |                                                                               |
| Fluoroquinolones<br>(ciprofloxacin, levofloxacin,<br>ofloxacin), oral 4 – 6 weeks     | Ciprofloxacin 2 x 500 – 750 mg<br>4 – 6 weeks                    | 6 – 9 packs of 10 500 mg<br>± 6 – 9 packs of 10 250<br>mg, excess <b>4 or 6 units</b><br>(2 or 3 days); single<br>dose 750 mg not<br>registered | 2 – 3 packs of 28 500 mg<br>units or 4 – 6 packs of<br>14 750 mg units,<br><b>matched</b> | 2 – 3 packs of 28 500<br>or 750 mg units,<br><b>matched</b>       | 6 – 9 packs of 10 500<br>or 750 mg, excess <b>4 or<br/>6 units</b> (2 or 3 days)                    | 2 – 3 packs of 28<br>units 500 or 750<br>mg, <b>matched</b>                       | 4 – 6 packs of 14<br>units of 500 or 750<br>mg, <b>matched</b>                |
|                                                                                       | Levofloxacin 1 x 500 mg 4 – 6<br>weeks                           | 2 – 3 packs of 14 units,<br><b>matched</b>                                                                                                      | 4 – 6 packs of 7 units,<br><b>matched</b>                                                 | Only bulk, not<br>applicable                                      | 3 – 5 packs of 10 units,<br>excess <b>2 or 8 units</b> (2<br>or 8 days)                             | 1 pack of 28 units<br>– 1 pack of 28 and<br>1 pack of 14 units,<br><b>matched</b> | 2 – 3 packs of 14<br>units, <b>matched</b>                                    |
|                                                                                       | Ofloxacin 2 x 200 mg 4 – 6<br>weeks                              | Not registered (only eye<br>drops)                                                                                                              | 4 – 6 packs of 14 units,<br><b>matched</b>                                                | Not registered (only<br>eye drops)                                | Not marketed                                                                                        | Not marketed                                                                      | 4 – 6 packs of 14<br>units, <b>matched</b>                                    |
| Trimethoprim /<br>sulfamethoxazole, oral 4 – 6<br>weeks                               | Trimethoprim /<br>sulfamethoxazole 2 x 160/800<br>mg 4 – 6 weeks | 3 – 5 packs of 20 units,<br>excess <b>4 or 16 units</b> (2<br>or 8 days)                                                                        | 4 – 6 packs of 14 units,<br><b>matched</b>                                                | 6 – 9 packs of 10,<br>excess <b>4 or 6 units</b> (2<br>or 3 days) | 6 – 9 packs of 20<br>80/400 mg units,<br>excess <b>8 or 12 half<br/>dose units</b> (2 or 3<br>days) | 4 – 6 packs of 16<br>units, excess <b>8 or<br/>12 units</b> (4 or 6<br>days)      | 3 – 5 packs of 20<br>units, excess <b>4 or<br/>16 units</b> (2 or 8<br>days)  |
| Macrolides, oral 4 – 6 weeks.<br>Possible and useful<br>administration in combination | Azithromycin 1 x 500 mg 3<br>times a week, 4 – 6 weeks           | 4 – 6 packs of 3 units,<br><b>matched</b>                                                                                                       | 1 pack of 12 units – 1<br>pack of 12 and 1 pack of<br>6 units, <b>matched</b>             | 4 – 6 packs of 3<br>units, <b>matched</b>                         | 4 – 6 packs of 3 units,<br><b>matched</b>                                                           | 4 – 6 packs of 3<br>units, <b>matched</b>                                         | 4 – 6 packs of 3<br>units, <b>matched</b>                                     |

|                                                                                                                                                                     |                                                                          |                                                                                             |                                                                         |                                                          |                                                                                                 |                                                                                                                                    |                                                                                             |
|---------------------------------------------------------------------------------------------------------------------------------------------------------------------|--------------------------------------------------------------------------|---------------------------------------------------------------------------------------------|-------------------------------------------------------------------------|----------------------------------------------------------|-------------------------------------------------------------------------------------------------|------------------------------------------------------------------------------------------------------------------------------------|---------------------------------------------------------------------------------------------|
| with fluoroquinolones, azithromycin 500 mg daily, only for the first three days of each treatment week                                                              |                                                                          |                                                                                             |                                                                         |                                                          |                                                                                                 |                                                                                                                                    |                                                                                             |
| 3rd generation oral cephalosporins ± parenteral aminoglycosides 7 – 10 days then switch to oral fluoroquinolones or trimethoprim / sulfamethoxazole for 2 – 4 weeks | Cefixime 1 x 400 mg or 2 x 200 mg 7 – 10 days                            | 1 pack of 10 400 mg units, excess 3 units (3 days) or <b>matched</b> if treated for 10 days | 1 pack of 14 200 mg units – 10 packs of 2 200 mg units, <b>matched</b>  | Not registered                                           | 1 pack of 10 400 mg units, excess 3 units (3 days) or <b>matched</b> if treated for 10 days     | 1 pack of 7 or 10 units, <b>matched</b>                                                                                            | 1 pack of 10 400 mg units, excess 3 units (3 days) or <b>matched</b> if treated for 10 days |
| oral fluoroquinolones or trimethoprim / sulfamethoxazole for 2 – 4 weeks                                                                                            | Fluoroquinolones – as for Treatment of acute bacterial prostatitis above |                                                                                             |                                                                         |                                                          |                                                                                                 |                                                                                                                                    |                                                                                             |
|                                                                                                                                                                     | Trimethoprim/sulfamethoxazole 2 x 160/800 mg 2 – 4 weeks – as above      |                                                                                             |                                                                         |                                                          |                                                                                                 |                                                                                                                                    |                                                                                             |
| Treatment of prostatitis caused by <i>C. trachomatis</i> , <i>U. urealyticum</i> and <i>M. genitalium</i>                                                           |                                                                          |                                                                                             |                                                                         |                                                          |                                                                                                 |                                                                                                                                    |                                                                                             |
| Azithromycin in a total dose of 4.5 g orally, for 3 weeks administered as PULSED THERAPY –                                                                          | Azithromycin 1 x 500 mg 3 times a week, 3 weeks                          | 3 packs of 3 units, <b>matched</b>                                                          | 3 packs of 3 units or 1 pack of 6 and 1 pack of 3 units, <b>matched</b> | 3 packs of 3 units, <b>matched</b>                       | 3 packs of 3 units, <b>matched</b>                                                              | 3 packs of 3 units, <b>matched</b>                                                                                                 | 3 packs of 3 units, <b>matched</b>                                                          |
| Levofloxacin 500 mg orally every day for 2 – 4 weeks                                                                                                                | Levofloxacin 1 x 500 mg 2 – 4 weeks                                      | As Treatment of acute bacterial prostatitis                                                 |                                                                         |                                                          |                                                                                                 |                                                                                                                                    |                                                                                             |
| Ofloxacin 2 x 300 mg up to 2 x 400 mg orally during 2 to 4 weeks                                                                                                    | Ofloxacin 2 x 300 mg up to 2 x 400 mg 2 to 4 weeks                       | Not registered                                                                              | 300 mg not registered, 2 – 4 14 400 mg unit packs, <b>matched</b>       | Not registered                                           | Not marketed                                                                                    | Not marketed                                                                                                                       | 4 – 8 14 units 200 mg packs, <b>matched</b>                                                 |
| Doxycycline 2 x 100 mg orally per day for 3 – 4 weeks                                                                                                               | Doxycycline 2 x 100 mg 3 – 4 weeks                                       | 2 – 3 packs of 25 units, excess <b>8 or 44 units</b> (4 or 22 days)                         | 3 packs of 7 units – 1 pack of 56 units, <b>matched</b>                 | 2 packs of 21 units – 8 packs of 7 units, <b>matched</b> | 6 – 7 packs of 8 units, excess <b>6 units</b> (3 days) or <b>matched</b> if treated for 4 weeks | 6 – 7 packs of 8 units, excess <b>6 units</b> (3 days) or <b>matched</b> if treated for 4 weeks                                    | 2 packs of 21 units – 4 packs of 14 units, <b>matched</b>                                   |
| Treatment of inflammatory chronic pelvic pain/nonbacterial prostatitis                                                                                              |                                                                          |                                                                                             |                                                                         |                                                          |                                                                                                 |                                                                                                                                    |                                                                                             |
| Empirical antimicrobial therapy (fluoroquinolones, trimethoprim / sulfamethoxazole, doxycycline) orally/2 weeks, In case of clinical improvement prolong to 4 weeks | Doxycycline 2 x 100 mg 2 – 4 weeks                                       | 2 – 3 packs of 25 units, excess <b>22 or 44 units</b> (11 or 22 days)                       | 1 pack of 28 – 1 pack of 56 units, <b>matched</b>                       | 4 – 8 packs of 7 units, <b>matched</b>                   | 4 – 7 packs of 8 units, excess 4 units (2 days) or <b>matched</b> if treated for 4 weeks        | 1 pack of 20 and one pack of 10 units – 7 packs of 8 units, excess <b>2 units</b> (1 day) or <b>matched</b> if treated for 4 weeks | 2 – 4 packs of 14 units, <b>matched</b>                                                     |
|                                                                                                                                                                     | Other – as above                                                         |                                                                                             |                                                                         |                                                          |                                                                                                 |                                                                                                                                    |                                                                                             |

<sup>1</sup> The Intersectoral Coordination Mechanism for the Control of Antimicrobial Resistance; The numbers in the brackets represent literature.

#### References:

1. Višnja Škerk GŠ, Ognjen Kraus, Jasmina Vraneš, Edita Sušić, Suzana Bukovski TH, Željko Kaštelan, Vesna Mađarić, Alemka Markotić SMM, Dragan Soldo, Dalibor Vukelić ATA. ISKRA Guidelines On Diagnostics and Treatment Of Prostatitis – Croatian National Guidelines. *Liječ Vjesn* **2017**, 139, 254-267.
2. National Institute for Health and Care Excellence guideline N. Prostatitis (acute): antimicrobial prescribing (NG110). 2018. Available from: <https://www.nice.org.uk/guidance/ng110> [Accessed: 28<sup>th</sup> January 2022].
3. Dickson G. Prostatitis Diagnosis and treatment. *Australian Family Physician* **2013**, 42, 4.
4. Fernández Urrusuno R, Serrano Martino C. *Guía Terapéutica Antimicrobiana del Área Aljarafe*, 3<sup>a</sup> ed.; online, 2018; pp. 159. Available from: [https://portal.guiasalud.es/wp-content/uploads/2018/12/GPC\\_578\\_Antimicrobianos\\_Aljarafe\\_2018.pdf](https://portal.guiasalud.es/wp-content/uploads/2018/12/GPC_578_Antimicrobianos_Aljarafe_2018.pdf) [Accessed: 28<sup>th</sup> January 2022]
5. Logar, M. Urogenital Tract Infections. *Farm Vestn* **2018**, 69, 114-121.
6. Società Italiana di Urologia. *Raccomandazioni in tema di Infezioni delle vie urinarie*, 1<sup>st</sup> ed.; online, 2015. pp. 149. Available from: <https://www.siu.it/linee-guida/raccomandazioni-siu/2015-raccomandazioni-siu/raccomandazioni-in-tema-di-infezioni-delle-vie-urinarie> [Accessed: 28<sup>th</sup> January 2022]
7. Agency for Medicinal Products and Medical Devices. Medicinal Products Database. Available from: <http://www.halmed.hr/en/Lijekovi/Baza-lijekova/> [Accessed: 28th January 2022].
8. The electronic medicines compendium. Available from: <https://www.medicines.org.uk/emc#gref> [Accessed: 28th January 2022].
9. The Therapeutic Goods Administration. ARTG Search. Available from: <https://tga-search.clients.funnelback.com/s/search.html?query=&collection=tga-artg> [Accessed: 28th January 2022].
10. MZ JAZMP ZZZS NIJZ. Centralna Baza Zdravil. Available from: [http://www.cbz.si/cbz/bazazdr2.nsf/Search/\\$searchForm?SearchView](http://www.cbz.si/cbz/bazazdr2.nsf/Search/$searchForm?SearchView) [Accessed: 28th January 2022].
11. Agenzia Italiana del Farmaco. La Banca Dati Farmaci. Available from: <https://farmaci.agenziafarmaco.gov.it/bancadatifarmaci/home> [Accessed: 28th January 2022].
12. CIMA. Find your medicine here. Available from: <http://cima.aemps.es/cima/publico/home.html> [Accessed: 28th January 2022].

**Figure S1.** Flowchart of selection of guidelines

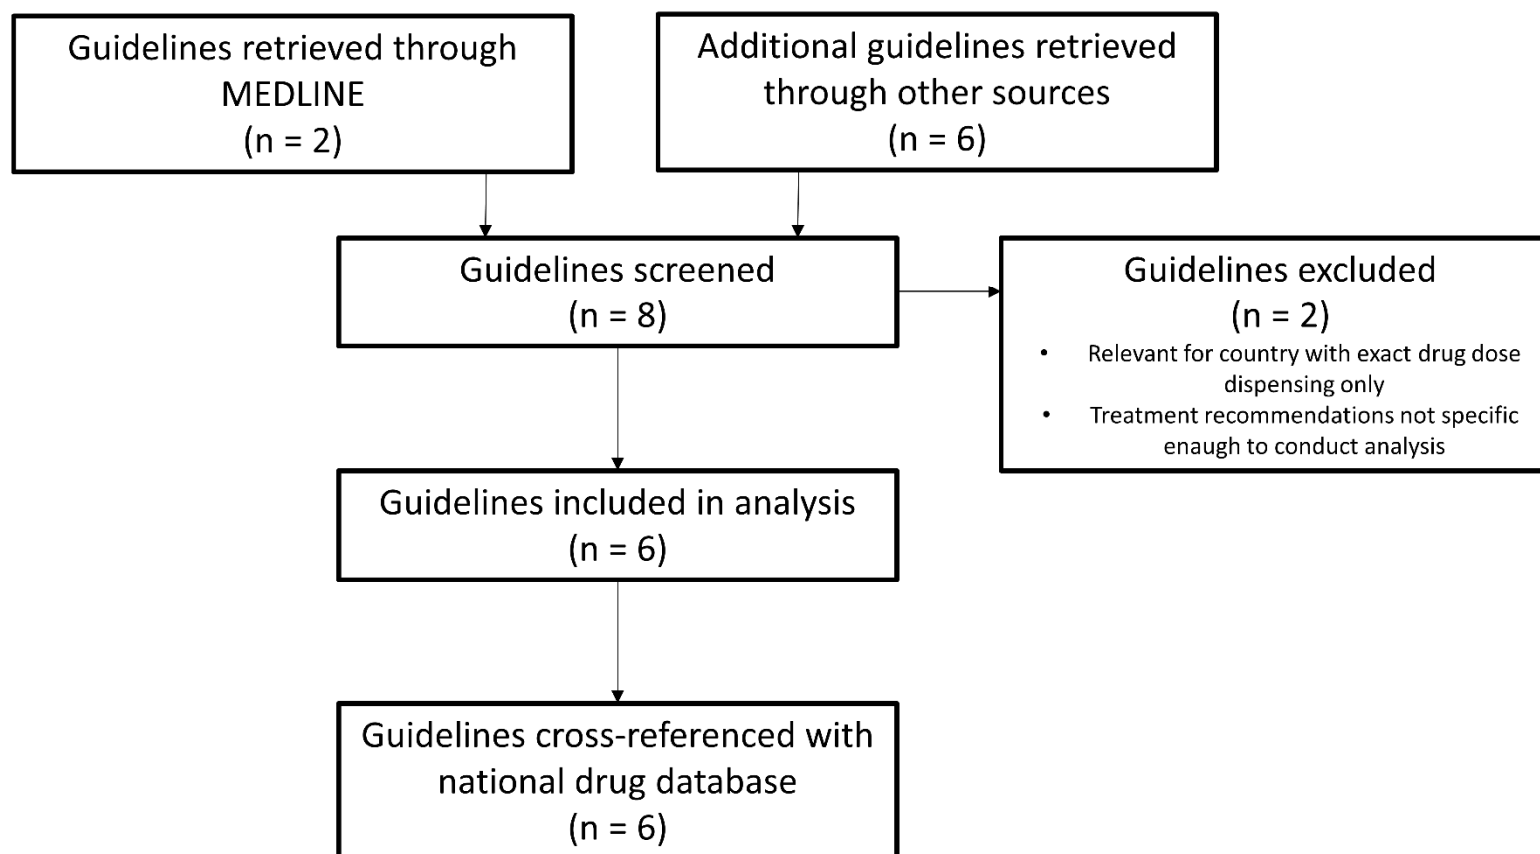

Supplement: s1 [file s1]
